# Supplementary material for: Predicting Coupled Herbs for the Treatment of Hypertension Complicated with Coronary Heart Disease in Real-World Data Based on a Complex Network and Machine Learning
Source: Evid Based Complement Alternat Med. 2022 Jan 22;2022:8285111. doi: 10.1155/2022/8285111 (PMC8800635; doi:10.1155/2022/8285111)
Supplement: Supplementary Materials — 1. Apriori: rules of the core herbs obtained for the Apriori algorithm. 2. Features of coupled herbs: The value of Jaccard similarity coefficient, OB, RWR, GoSim, Manhattan distance, and KNN model output of coupled herbs. 3. The main coupled herbs: Seventy coupled herbs for adjuvant treatment of hypertension complicated with coronary heart disease screened by the KNN model. 4. TCM herbs information: the Chinese name, Pinyin name, Latin name, and English name of herbs in this study. [file 8285111.f1.zip]

Archive with 4 entries (4 files):
- 8285111.f1/1. Apriori.txt
- 8285111.f1/2. Features of coupled herbs.txt
- 8285111.f1/3. The main coupled herbs.txt
- 8285111.f1/4. TCM herbs information.txt
