# Supplementary material for: Predicting Coupled Herbs for the Treatment of Hypertension Complicated with Coronary Heart Disease in Real-World Data Based on a Complex Network and Machine Learning
Source: Evid Based Complement Alternat Med. 2022 Jan 22;2022:8285111. doi: 10.1155/2022/8285111 (PMC8800635; doi:10.1155/2022/8285111)
Supplement: Supplementary Materials — 1. Apriori: rules of the core herbs obtained for the Apriori algorithm. 2. Features of coupled herbs: The value of Jaccard similarity coefficient, OB, RWR, GoSim, Manhattan distance, and KNN model output of coupled herbs. 3. The main coupled herbs: Seventy coupled herbs for adjuvant treatment of hypertension complicated with coronary heart disease screened by the KNN model. 4. TCM herbs information: the Chinese name, Pinyin name, Latin name, and English name of herbs in this study. [file 8285111.f1.zip › 8285111.f1/1. Apriori.txt]

lhs		rhs	support	confidence	coverage	lift	count
sanqi	=>	baizhu	0.078708741	0.280361757	0.280739935	0.97349794	217
baizhu	=>	sanqi	0.078708741	0.273299748	0.287994197	0.97349794	217
sanqi	=>	chenpi	0.063112078	0.224806202	0.280739935	0.715693646	174
chenpi	=>	sanqi	0.063112078	0.200923788	0.314109539	0.715693646	174
sanqi	=>	gancao	0.08088502	0.288113695	0.280739935	0.841450696	223
gancao	=>	sanqi	0.08088502	0.236228814	0.342401161	0.841450696	223
sanqi	=>	gegen	0.121508886	0.432816537	0.280739935	1.304125895	335
gegen	=>	sanqi	0.121508886	0.366120219	0.331882481	1.304125895	335
sanqi	=>	baishao	0.107725789	0.38372093	0.280739935	1.07185269	297
baishao	=>	sanqi	0.107725789	0.300911854	0.357997824	1.07185269	297
sanqi	=>	banxia	0.088864708	0.316537468	0.280739935	0.861494372	245
banxia	=>	sanqi	0.088864708	0.241855874	0.367428364	0.861494372	245
sanqi	=>	suanzaoren	0.151976786	0.541343669	0.280739935	1.489505485	419
suanzaoren	=>	sanqi	0.151976786	0.418163673	0.36343852	1.489505485	419
sanqi	=>	danshen	0.14653609	0.521963824	0.280739935	1.259015104	404
danshen	=>	sanqi	0.14653609	0.353455818	0.414581066	1.259015104	404
sanqi	=>	wuweizi	0.163583605	0.582687339	0.280739935	1.529970469	451
wuweizi	=>	sanqi	0.163583605	0.42952381	0.380848749	1.529970469	451
sanqi	=>	dangshen	0.125136017	0.445736434	0.280739935	1.103137656	345
dangshen	=>	sanqi	0.125136017	0.309694794	0.404062387	1.103137656	345
sanqi	=>	dihuang	0.125498731	0.447028424	0.280739935	0.991518394	346
dihuang	=>	sanqi	0.125498731	0.278358809	0.450852376	0.991518394	346
sanqi	=>	fuling	0.118607182	0.42248062	0.280739935	0.840388939	327
fuling	=>	sanqi	0.118607182	0.235930736	0.502720348	0.840388939	327
sanqi	=>	huanglian	0.184620965	0.657622739	0.280739935	1.332157158	509
huanglian	=>	sanqi	0.184620965	0.373989713	0.493652521	1.332157158	509
sanqi	=>	danggui	0.174464998	0.621447028	0.280739935	1.23706098	481
danggui	=>	sanqi	0.174464998	0.347292419	0.502357635	1.23706098	481
sanqi	=>	maidong	0.182444686	0.649870801	0.280739935	1.227187533	503
maidong	=>	sanqi	0.182444686	0.344520548	0.529561117	1.227187533	503
sanqi	=>	chuanxiong	0.203119333	0.723514212	0.280739935	1.310597032	560
chuanxiong	=>	sanqi	0.203119333	0.367936925	0.552049329	1.310597032	560
sanqi	=>	huangqi	0.204570185	0.728682171	0.280739935	1.284511985	564
huangqi	=>	sanqi	0.204570185	0.360613811	0.567283279	1.284511985	564
baizhu	=>	chenpi	0.123685165	0.429471033	0.287994197	1.36726517	341
chenpi	=>	baizhu	0.123685165	0.393764434	0.314109539	1.36726517	341
baizhu	=>	gancao	0.131664853	0.457178841	0.287994197	1.335214052	363
gancao	=>	baizhu	0.131664853	0.384533898	0.342401161	1.335214052	363
baizhu	=>	gegen	0.098295248	0.341309824	0.287994197	1.028405665	271
gegen	=>	baizhu	0.098295248	0.296174863	0.331882481	1.028405665	271
baizhu	=>	baishao	0.124047878	0.430730479	0.287994197	1.203165075	342
baishao	=>	baizhu	0.124047878	0.346504559	0.357997824	1.203165075	342
baizhu	=>	banxia	0.144359811	0.501259446	0.287994197	1.364237208	398
banxia	=>	baizhu	0.144359811	0.392892399	0.367428364	1.364237208	398
baizhu	=>	suanzaoren	0.100471527	0.348866499	0.287994197	0.959905127	277
suanzaoren	=>	baizhu	0.100471527	0.276447106	0.36343852	0.959905127	277
baizhu	=>	danshen	0.114980051	0.399244332	0.287994197	0.963006671	317
danshen	=>	baizhu	0.114980051	0.277340332	0.414581066	0.963006671	317
baizhu	=>	wuweizi	0.123322452	0.428211587	0.287994197	1.124361281	340
wuweizi	=>	baizhu	0.123322452	0.323809524	0.380848749	1.124361281	340
baizhu	=>	dangshen	0.149800508	0.520151134	0.287994197	1.287304017	413
dangshen	=>	baizhu	0.149800508	0.370736086	0.404062387	1.287304017	413
baizhu	=>	dihuang	0.134929271	0.468513854	0.287994197	1.039173528	372
dihuang	=>	baizhu	0.134929271	0.299275945	0.450852376	1.039173528	372
baizhu	=>	fuling	0.204570185	0.710327456	0.287994197	1.412967385	564
fuling	=>	baizhu	0.204570185	0.406926407	0.502720348	1.412967385	564
baizhu	=>	huanglian	0.146173377	0.507556675	0.287994197	1.028165873	403
huanglian	=>	baizhu	0.146173377	0.296105805	0.493652521	1.028165873	403
baizhu	=>	danggui	0.158505622	0.550377834	0.287994197	1.095589666	437
danggui	=>	baizhu	0.158505622	0.315523466	0.502357635	1.095589666	437
baizhu	=>	maidong	0.171563293	0.595717884	0.287994197	1.124927539	473
maidong	=>	baizhu	0.171563293	0.323972603	0.529561117	1.124927539	473
baizhu	=>	chuanxiong	0.15705477	0.54534005	0.287994197	0.987846596	433
chuanxiong	=>	baizhu	0.15705477	0.284494087	0.552049329	0.987846596	433
baizhu	=>	huangqi	0.196590497	0.682619647	0.287994197	1.203313534	542
huangqi	=>	baizhu	0.196590497	0.346547315	0.567283279	1.203313534	542
chenpi	=>	gancao	0.150888647	0.480369515	0.314109539	1.402943594	416
gancao	=>	chenpi	0.150888647	0.440677966	0.342401161	1.402943594	416
chenpi	=>	gegen	0.104461371	0.33256351	0.314109539	1.00205202	288
gegen	=>	chenpi	0.104461371	0.314754098	0.331882481	1.00205202	288
chenpi	=>	baishao	0.125498731	0.399538106	0.314109539	1.116035014	346
baishao	=>	chenpi	0.125498731	0.350557244	0.357997824	1.116035014	346
chenpi	=>	banxia	0.205658324	0.654734411	0.314109539	1.781937583	567
banxia	=>	chenpi	0.205658324	0.559723593	0.367428364	1.781937583	567
chenpi	=>	suanzaoren	0.088501995	0.281755196	0.314109539	0.775248579	244
suanzaoren	=>	chenpi	0.088501995	0.243512974	0.36343852	0.775248579	244
chenpi	=>	danshen	0.112441059	0.357967667	0.314109539	0.863444321	310
danshen	=>	chenpi	0.112441059	0.271216098	0.414581066	0.863444321	310
chenpi	=>	wuweizi	0.102647806	0.326789838	0.314109539	0.858056747	283
wuweizi	=>	chenpi	0.102647806	0.26952381	0.380848749	0.858056747	283
chenpi	=>	dangshen	0.157417483	0.501154734	0.314109539	1.240290487	434
dangshen	=>	chenpi	0.157417483	0.389587074	0.404062387	1.240290487	434
chenpi	=>	dihuang	0.119695321	0.381062356	0.314109539	0.845204276	330
dihuang	=>	chenpi	0.119695321	0.265486726	0.450852376	0.845204276	330
chenpi	=>	fuling	0.232499093	0.740184758	0.314109539	1.472358857	641
fuling	=>	chenpi	0.232499093	0.462481962	0.502720348	1.472358857	641
chenpi	=>	huanglian	0.15596663	0.496535797	0.314109539	1.005840699	430
huanglian	=>	chenpi	0.15596663	0.315944159	0.493652521	1.005840699	430
chenpi	=>	danggui	0.149437795	0.475750577	0.314109539	0.947035626	412
danggui	=>	chenpi	0.149437795	0.297472924	0.502357635	0.947035626	412
chenpi	=>	maidong	0.160681901	0.511547344	0.314109539	0.965983581	443
maidong	=>	chenpi	0.160681901	0.303424658	0.529561117	0.965983581	443
chenpi	=>	chuanxiong	0.151976786	0.483833718	0.314109539	0.876432038	419
chuanxiong	=>	chenpi	0.151976786	0.275295664	0.552049329	0.876432038	419
chenpi	=>	huangqi	0.169024302	0.538106236	0.314109539	0.948567066	466
huangqi	=>	chenpi	0.169024302	0.297953964	0.567283279	0.948567066	466
gancao	=>	gegen	0.109902067	0.320974576	0.342401161	0.967133231	303
gegen	=>	gancao	0.109902067	0.331147541	0.331882481	0.967133231	303
gancao	=>	baishao	0.133841132	0.390889831	0.342401161	1.091877672	369
baishao	=>	gancao	0.133841132	0.373860182	0.357997824	1.091877672	369
gancao	=>	banxia	0.178817555	0.522245763	0.342401161	1.421353966	493
banxia	=>	gancao	0.178817555	0.486673248	0.367428364	1.421353966	493
gancao	=>	suanzaoren	0.095030831	0.277542373	0.342401161	0.763657008	262
suanzaoren	=>	gancao	0.095030831	0.261477046	0.36343852	0.763657008	262
gancao	=>	danshen	0.145447951	0.424788136	0.342401161	1.024620201	401
danshen	=>	gancao	0.145447951	0.350831146	0.414581066	1.024620201	401
gancao	=>	wuweizi	0.118244469	0.345338983	0.342401161	0.906761501	326
wuweizi	=>	gancao	0.118244469	0.31047619	0.380848749	0.906761501	326
gancao	=>	dangshen	0.151976786	0.443855932	0.342401161	1.098483667	419
dangshen	=>	gancao	0.151976786	0.376122083	0.404062387	1.098483667	419
gancao	=>	dihuang	0.154153065	0.450211864	0.342401161	0.998579332	425
dihuang	=>	gancao	0.154153065	0.341914722	0.450852376	0.998579332	425
gancao	=>	fuling	0.202393906	0.591101695	0.342401161	1.175806185	558
fuling	=>	gancao	0.202393906	0.402597403	0.502720348	1.175806185	558
gancao	=>	huanglian	0.14653609	0.427966102	0.342401161	0.866937944	404
huanglian	=>	gancao	0.14653609	0.296840558	0.493652521	0.866937944	404
gancao	=>	danggui	0.168661589	0.492584746	0.342401161	0.980545952	465
danggui	=>	gancao	0.168661589	0.335740072	0.502357635	0.980545952	465
gancao	=>	maidong	0.169024302	0.493644068	0.342401161	0.932175818	466
maidong	=>	gancao	0.169024302	0.319178082	0.529561117	0.932175818	466
gancao	=>	chuanxiong	0.18171926	0.530720339	0.342401161	0.961363978	501
chuanxiong	=>	gancao	0.18171926	0.329172142	0.552049329	0.961363978	501
gancao	=>	huangqi	0.184258252	0.538135593	0.342401161	0.948618817	508
huangqi	=>	gancao	0.184258252	0.324808184	0.567283279	0.948618817	508
gegen	=>	baishao	0.133478419	0.402185792	0.331882481	1.12343083	368
baishao	=>	gegen	0.133478419	0.372847011	0.357997824	1.12343083	368
gegen	=>	banxia	0.128400435	0.386885246	0.331882481	1.052954218	354
banxia	=>	gegen	0.128400435	0.349457058	0.367428364	1.052954218	354
gegen	=>	suanzaoren	0.125498731	0.378142077	0.331882481	1.040456791	346
suanzaoren	=>	gegen	0.125498731	0.345309381	0.36343852	1.040456791	346
gegen	=>	danshen	0.175190424	0.527868852	0.331882481	1.273258466	483
danshen	=>	gegen	0.175190424	0.422572178	0.414581066	1.273258466	483
gegen	=>	wuweizi	0.148349655	0.446994536	0.331882481	1.173679938	409
wuweizi	=>	gegen	0.148349655	0.38952381	0.380848749	1.173679938	409
gegen	=>	dangshen	0.137468263	0.41420765	0.331882481	1.025108161	379
dangshen	=>	gegen	0.137468263	0.34021544	0.404062387	1.025108161	379
gegen	=>	dihuang	0.156692057	0.472131148	0.331882481	1.047196761	432
dihuang	=>	gegen	0.156692057	0.347546259	0.450852376	1.047196761	432
gegen	=>	fuling	0.163583605	0.492896175	0.331882481	0.980457976	451
fuling	=>	gegen	0.163583605	0.325396825	0.502720348	0.980457976	451
gegen	=>	huanglian	0.180993834	0.545355191	0.331882481	1.104734947	499
huanglian	=>	gegen	0.180993834	0.366642175	0.493652521	1.104734947	499
gegen	=>	danggui	0.184258252	0.555191257	0.331882481	1.105171332	508
danggui	=>	gegen	0.184258252	0.366787004	0.502357635	1.105171332	508
gegen	=>	maidong	0.188248096	0.567213115	0.331882481	1.071100382	519
maidong	=>	gegen	0.188248096	0.355479452	0.529561117	1.071100382	519
gegen	=>	chuanxiong	0.235763511	0.710382514	0.331882481	1.286809849	650
chuanxiong	=>	gegen	0.235763511	0.427069645	0.552049329	1.286809849	650
gegen	=>	huangqi	0.225970258	0.680874317	0.331882481	1.200236887	623
huangqi	=>	gegen	0.225970258	0.398337596	0.567283279	1.200236887	623
baishao	=>	banxia	0.153790352	0.4295846	0.357997824	1.169165589	424
banxia	=>	baishao	0.153790352	0.418558736	0.367428364	1.169165589	424
baishao	=>	suanzaoren	0.159231048	0.444782168	0.357997824	1.223816804	439
suanzaoren	=>	baishao	0.159231048	0.438123752	0.36343852	1.223816804	439
baishao	=>	danshen	0.160319188	0.447821682	0.357997824	1.080178807	442
danshen	=>	baishao	0.160319188	0.386701662	0.414581066	1.080178807	442
baishao	=>	wuweizi	0.152339499	0.425531915	0.357997824	1.117325228	420
wuweizi	=>	baishao	0.152339499	0.4	0.380848749	1.117325228	420
baishao	=>	dangshen	0.150525934	0.420466059	0.357997824	1.04059688	415
dangshen	=>	baishao	0.150525934	0.372531418	0.404062387	1.04059688	415
baishao	=>	dihuang	0.185346391	0.517730496	0.357997824	1.148337071	511
dihuang	=>	baishao	0.185346391	0.411102172	0.450852376	1.148337071	511
baishao	=>	fuling	0.197315923	0.551165147	0.357997824	1.096365303	544
fuling	=>	baishao	0.197315923	0.392496392	0.502720348	1.096365303	544
baishao	=>	huanglian	0.180993834	0.505572442	0.357997824	1.024146379	499
huanglian	=>	baishao	0.180993834	0.366642175	0.493652521	1.024146379	499
baishao	=>	danggui	0.208922742	0.583586626	0.357997824	1.161695544	576
danggui	=>	baishao	0.208922742	0.415884477	0.502357635	1.161695544	576
baishao	=>	maidong	0.189698948	0.529888551	0.357997824	1.000618312	523
maidong	=>	baishao	0.189698948	0.358219178	0.529561117	1.000618312	523
baishao	=>	chuanxiong	0.218715996	0.610942249	0.357997824	1.10668054	603
chuanxiong	=>	baishao	0.218715996	0.396189225	0.552049329	1.10668054	603
baishao	=>	huangqi	0.219441422	0.612968592	0.357997824	1.080533509	605
huangqi	=>	baishao	0.219441422	0.386828645	0.567283279	1.080533509	605
banxia	=>	suanzaoren	0.124773304	0.33958539	0.367428364	0.934368184	344
suanzaoren	=>	banxia	0.124773304	0.343313373	0.36343852	0.934368184	344
banxia	=>	danshen	0.169387015	0.46100691	0.367428364	1.111982547	467
danshen	=>	banxia	0.169387015	0.408573928	0.414581066	1.111982547	467
banxia	=>	wuweizi	0.124410591	0.338598223	0.367428364	0.889062192	343
wuweizi	=>	banxia	0.124410591	0.326666667	0.380848749	0.889062192	343
banxia	=>	dangshen	0.178092129	0.484698914	0.367428364	1.199564548	491
dangshen	=>	banxia	0.178092129	0.440754039	0.404062387	1.199564548	491
banxia	=>	dihuang	0.141458107	0.384995064	0.367428364	0.853927105	390
dihuang	=>	banxia	0.141458107	0.313757039	0.450852376	0.853927105	390
banxia	=>	fuling	0.241929634	0.658440276	0.367428364	1.309754576	667
fuling	=>	banxia	0.241929634	0.481240981	0.502720348	1.309754576	667
banxia	=>	huanglian	0.207834603	0.565646594	0.367428364	1.145839574	573
huanglian	=>	banxia	0.207834603	0.42101396	0.493652521	1.145839574	573
banxia	=>	danggui	0.165034458	0.449160908	0.367428364	0.894105866	455
danggui	=>	banxia	0.165034458	0.328519856	0.502357635	0.894105866	455
banxia	=>	maidong	0.17700399	0.481737414	0.367428364	0.909691815	488
maidong	=>	banxia	0.17700399	0.334246575	0.529561117	0.909691815	488
banxia	=>	chuanxiong	0.195865071	0.533070089	0.367428364	0.965620391	540
chuanxiong	=>	banxia	0.195865071	0.354796321	0.552049329	0.965620391	540
banxia	=>	huangqi	0.199492202	0.542941757	0.367428364	0.957091064	550
huangqi	=>	banxia	0.199492202	0.351662404	0.567283279	0.957091064	550
suanzaoren	=>	danshen	0.193688792	0.532934132	0.36343852	1.285476292	534
danshen	=>	suanzaoren	0.193688792	0.467191601	0.414581066	1.285476292	534
suanzaoren	=>	wuweizi	0.190061661	0.522954092	0.36343852	1.37312803	524
wuweizi	=>	suanzaoren	0.190061661	0.499047619	0.380848749	1.37312803	524
suanzaoren	=>	dangshen	0.159593761	0.439121756	0.36343852	1.08676722	440
dangshen	=>	suanzaoren	0.159593761	0.39497307	0.404062387	1.08676722	440
suanzaoren	=>	dihuang	0.189698948	0.521956088	0.36343852	1.157709521	523
dihuang	=>	suanzaoren	0.189698948	0.420756235	0.450852376	1.157709521	523
suanzaoren	=>	fuling	0.178454842	0.491017964	0.36343852	0.976721881	492
fuling	=>	suanzaoren	0.178454842	0.354978355	0.502720348	0.976721881	492
suanzaoren	=>	huanglian	0.231410954	0.636726547	0.36343852	1.289827399	638
huanglian	=>	suanzaoren	0.231410954	0.468772961	0.493652521	1.289827399	638
suanzaoren	=>	danggui	0.219078709	0.602794411	0.36343852	1.199930824	604
danggui	=>	suanzaoren	0.219078709	0.436101083	0.502357635	1.199930824	604
suanzaoren	=>	maidong	0.2216177	0.609780439	0.36343852	1.151482651	611
maidong	=>	suanzaoren	0.2216177	0.418493151	0.529561117	1.151482651	611
suanzaoren	=>	chuanxiong	0.232499093	0.639720559	0.36343852	1.1588105	641
chuanxiong	=>	suanzaoren	0.232499093	0.421156373	0.552049329	1.1588105	641
suanzaoren	=>	huangqi	0.233224519	0.641716567	0.36343852	1.131210086	643
huangqi	=>	suanzaoren	0.233224519	0.41112532	0.567283279	1.131210086	643
danshen	=>	wuweizi	0.190424374	0.459317585	0.414581066	1.206036745	525
wuweizi	=>	danshen	0.190424374	0.5	0.380848749	1.206036745	525
danshen	=>	dangshen	0.157417483	0.379702537	0.414581066	0.939712653	434
dangshen	=>	danshen	0.157417483	0.389587074	0.404062387	0.939712653	434
danshen	=>	dihuang	0.185709104	0.447944007	0.414581066	0.993549177	512
dihuang	=>	danshen	0.185709104	0.411906677	0.450852376	0.993549177	512
danshen	=>	fuling	0.205295611	0.495188101	0.414581066	0.985017024	566
fuling	=>	danshen	0.205295611	0.408369408	0.502720348	0.985017024	566
danshen	=>	huanglian	0.202393906	0.488188976	0.414581066	0.988932408	558
huanglian	=>	danshen	0.202393906	0.409992652	0.493652521	0.988932408	558
danshen	=>	danggui	0.20638375	0.497812773	0.414581066	0.990952936	569
danggui	=>	danshen	0.20638375	0.410830325	0.502357635	0.990952936	569
danshen	=>	maidong	0.227783823	0.549431321	0.414581066	1.037522022	628
maidong	=>	danshen	0.227783823	0.430136986	0.529561117	1.037522022	628
danshen	=>	chuanxiong	0.26731955	0.644794401	0.414581066	1.168001421	737
chuanxiong	=>	danshen	0.26731955	0.484231275	0.552049329	1.168001421	737
danshen	=>	huangqi	0.274211099	0.661417323	0.414581066	1.165938337	756
huangqi	=>	danshen	0.274211099	0.483375959	0.567283279	1.165938337	756
wuweizi	=>	dangshen	0.197315923	0.518095238	0.380848749	1.282215953	544
dangshen	=>	wuweizi	0.197315923	0.488330341	0.404062387	1.282215953	544
wuweizi	=>	dihuang	0.191149801	0.501904762	0.380848749	1.11323526	527
dihuang	=>	wuweizi	0.191149801	0.423974256	0.450852376	1.11323526	527
wuweizi	=>	fuling	0.182444686	0.479047619	0.380848749	0.95291074	503
fuling	=>	wuweizi	0.182444686	0.362914863	0.502720348	0.95291074	503
wuweizi	=>	huanglian	0.208922742	0.548571429	0.380848749	1.111250131	576
huanglian	=>	wuweizi	0.208922742	0.423218222	0.493652521	1.111250131	576
wuweizi	=>	danggui	0.213275299	0.56	0.380848749	1.114743682	588
danggui	=>	wuweizi	0.213275299	0.424548736	0.502357635	1.114743682	588
wuweizi	=>	maidong	0.339499456	0.891428571	0.380848749	1.683334638	936
maidong	=>	wuweizi	0.339499456	0.64109589	0.529561117	1.683334638	936
wuweizi	=>	chuanxiong	0.233949946	0.614285714	0.380848749	1.112737	645
chuanxiong	=>	wuweizi	0.233949946	0.423784494	0.552049329	1.112737	645
wuweizi	=>	huangqi	0.295973885	0.777142857	0.380848749	1.369937888	816
huangqi	=>	wuweizi	0.295973885	0.52173913	0.567283279	1.369937888	816
dangshen	=>	dihuang	0.18752267	0.464093357	0.404062387	1.029368774	517
dihuang	=>	dangshen	0.18752267	0.415929204	0.450852376	1.029368774	517
dangshen	=>	fuling	0.249546609	0.617594255	0.404062387	1.228504589	688
fuling	=>	dangshen	0.249546609	0.496392496	0.502720348	1.228504589	688
dangshen	=>	huanglian	0.224519405	0.555655296	0.404062387	1.125600038	619
huanglian	=>	dangshen	0.224519405	0.454812638	0.493652521	1.125600038	619
dangshen	=>	danggui	0.231048241	0.571813285	0.404062387	1.13825937	637
danggui	=>	dangshen	0.231048241	0.459927798	0.502357635	1.13825937	637
dangshen	=>	maidong	0.256075444	0.633752244	0.404062387	1.196749957	706
maidong	=>	dangshen	0.256075444	0.483561644	0.529561117	1.196749957	706
dangshen	=>	chuanxiong	0.226332971	0.560143627	0.404062387	1.014662272	624
chuanxiong	=>	dangshen	0.226332971	0.409986859	0.552049329	1.014662272	624
dangshen	=>	huangqi	0.28726877	0.710951526	0.404062387	1.253256622	792
huangqi	=>	dangshen	0.28726877	0.506393862	0.567283279	1.253256622	792
dihuang	=>	fuling	0.212549873	0.471440064	0.450852376	0.937777964	586
fuling	=>	dihuang	0.212549873	0.422799423	0.502720348	0.937777964	586
dihuang	=>	huanglian	0.267682263	0.593724859	0.450852376	1.202718175	738
huanglian	=>	dihuang	0.267682263	0.542248347	0.493652521	1.202718175	738
dihuang	=>	danggui	0.288719623	0.640386163	0.450852376	1.27476148	796
danggui	=>	dihuang	0.288719623	0.574729242	0.502357635	1.27476148	796
dihuang	=>	maidong	0.27783823	0.616251006	0.450852376	1.163701385	766
maidong	=>	dihuang	0.27783823	0.524657534	0.529561117	1.163701385	766
dihuang	=>	chuanxiong	0.274211099	0.608205953	0.450852376	1.101723925	756
chuanxiong	=>	dihuang	0.274211099	0.496714849	0.552049329	1.101723925	756
dihuang	=>	huangqi	0.265505985	0.588897828	0.450852376	1.038101861	732
huangqi	=>	dihuang	0.265505985	0.468030691	0.567283279	1.038101861	732
fuling	=>	huanglian	0.240478781	0.478354978	0.502720348	0.969011518	663
huanglian	=>	fuling	0.240478781	0.487141807	0.493652521	0.969011518	663
fuling	=>	danggui	0.244831338	0.487012987	0.502720348	0.969454733	675
danggui	=>	fuling	0.244831338	0.487364621	0.502357635	0.969454733	675
fuling	=>	maidong	0.260790715	0.518759019	0.502720348	0.979601791	719
maidong	=>	fuling	0.260790715	0.492465753	0.529561117	0.979601791	719
fuling	=>	chuanxiong	0.259339862	0.515873016	0.502720348	0.934469057	715
chuanxiong	=>	fuling	0.259339862	0.46977661	0.552049329	0.934469057	715
fuling	=>	huangqi	0.291258614	0.579365079	0.502720348	1.021297649	803
huangqi	=>	fuling	0.291258614	0.51342711	0.567283279	1.021297649	803
huanglian	=>	danggui	0.284729779	0.576781778	0.493652521	1.14814972	785
danggui	=>	huanglian	0.284729779	0.566787004	0.502357635	1.14814972	785
huanglian	=>	maidong	0.284729779	0.576781778	0.493652521	1.089169426	785
maidong	=>	huanglian	0.284729779	0.537671233	0.529561117	1.089169426	785
huanglian	=>	chuanxiong	0.306129851	0.620132256	0.493652521	1.123327614	844
chuanxiong	=>	huanglian	0.306129851	0.554533509	0.552049329	1.123327614	844
huanglian	=>	huangqi	0.291258614	0.590007348	0.493652521	1.040057709	803
huangqi	=>	huanglian	0.291258614	0.51342711	0.567283279	1.040057709	803
danggui	=>	maidong	0.279289082	0.555956679	0.502357635	1.049844221	770
maidong	=>	danggui	0.279289082	0.52739726	0.529561117	1.049844221	770
danggui	=>	chuanxiong	0.341313021	0.679422383	0.502357635	1.230727667	941
chuanxiong	=>	danggui	0.341313021	0.61826544	0.552049329	1.230727667	941
danggui	=>	huangqi	0.31882481	0.63465704	0.502357635	1.118765638	879
huangqi	=>	danggui	0.31882481	0.56202046	0.567283279	1.118765638	879
maidong	=>	chuanxiong	0.306129851	0.578082192	0.529561117	1.047156769	844
chuanxiong	=>	maidong	0.306129851	0.554533509	0.552049329	1.047156769	844
maidong	=>	huangqi	0.373594487	0.705479452	0.529561117	1.243610517	1030
huangqi	=>	maidong	0.373594487	0.658567775	0.567283279	1.243610517	1030
chuanxiong	=>	huangqi	0.349655423	0.633377135	0.552049329	1.116509439	964
huangqi	=>	chuanxiong	0.349655423	0.616368286	0.567283279	1.116509439	964
