# Supplementary material for: Predicting Coupled Herbs for the Treatment of Hypertension Complicated with Coronary Heart Disease in Real-World Data Based on a Complex Network and Machine Learning
Source: Evid Based Complement Alternat Med. 2022 Jan 22;2022:8285111. doi: 10.1155/2022/8285111 (PMC8800635; doi:10.1155/2022/8285111)
Supplement: Supplementary Materials — 1. Apriori: rules of the core herbs obtained for the Apriori algorithm. 2. Features of coupled herbs: The value of Jaccard similarity coefficient, OB, RWR, GoSim, Manhattan distance, and KNN model output of coupled herbs. 3. The main coupled herbs: Seventy coupled herbs for adjuvant treatment of hypertension complicated with coronary heart disease screened by the KNN model. 4. TCM herbs information: the Chinese name, Pinyin name, Latin name, and English name of herbs in this study. [file 8285111.f1.zip › 8285111.f1/2. Features of coupled herbs.txt]

lhs	rhs	Jaccard	OB	RWR	GOSim	Manmanhattan distance	KNN_model
banxia	maidong	0	2394.9921	1866.311435	15021.819	1497	0.031218954
chuanxiong	fuling	0.01978022	4659.321	2074.930106	16970.909	1478	0.231087415
baizhu	danshen	0.091584158	6553.9028	5131.609838	43837.134	1303	0.343519786
danggui	gancao	0.031830239	7826.5224	7468.053504	64464.23	1399	0.060442487
dihuang	gancao	0	5647.0389	6515.717174	57334.685	1492	0.005894324
baishao	huanglian	0	2543.4345	2084.917624	18094.145	1350	0.159152675
dihuang	gegen	0	390.2124	286.9921432	2346.494	1449	0.146891653
baishao	chenpi	0	3038.9564	2093.179627	18220.644	1161	0.922875056
danggui	huanglian	0.0041841	3347.0683	2186.028236	17466.1	1176	0.9488628
baishao	danggui	0.028169014	3755.9548	1901.872459	15566.807	1220	0.808071567
dihuang	maidong	0	275.7072	263.3621797	2276.28	1326	0.364137344
dangshen	huangqi	0.176470588	3813.3349	3529.334969	30076.719	1094	0.824567287
chuanxiong	gegen	0	4326.9602	1755.200947	13978.647	1137	0.930707454
baizhu	banxia	0.177142857	4116.4715	2601.473605	20629.093	1011	0.939557513
huangqi	wuweizi	0.003773585	3848.3579	3347.99931	28408.714	982	0.873026593
chenpi	gancao	0.081784387	7109.524	7659.360672	67118.067	978	0.864752299
chenpi	sanqi	0	3981.9612	3103.918963	26861.817	1292	0.349888273
danshen	gancao	0.005434783	10203.7551	10648.80266	93288.265	1285	0.211846679
dangshen	gegen	0	2277.2102	1594.520547	13768.692	1271	0.208890944
danshen	maidong	0	4832.4234	4396.447668	38229.86	1347	0.117092356
gegen	maidong	0	465.298	452.0439117	3943.102	1337	0.513226769
huanglian	maidong	0	1242.6704	1398.743675	11933.163	1251	0.411334025
gegen	huanglian	0	1357.1756	1422.373638	12003.377	1278	0.455997702
danggui	wuweizi	0.060209424	4302.1259	2176.839487	17563.41	1259	0.775192987
chuanxiong	huangqi	0.04040404	5863.0849	3690.015369	30286.674	1158	0.916980732
huangqi	suanzaoren	0.011764706	2176.2651	2437.635161	20450.636	1280	0.554968585
baizhu	huangqi	0.054263566	3722.9021	3122.020504	25858.403	1274	0.645793566
maidong	sanqi	0	2594.5617	2125.327234	18675.043	1228	0.649108462
huangqi	maidong	0	2001.4227	2386.858333	20251.129	964	1
baizhu	fuling	0	2519.1382	1506.935241	12542.638	1052	0.981844654
maidong	wuweizi	0	2197.728	1389.554925	12030.473	638	1
dangshen	danshen	0.027542373	6644.3356	5538.924303	48055.45	1389	0
chenpi	maidong	0	1738.1923	1407.005678	12059.662	1440	0.146891653
fuling	suanzaoren	0.25	972.5012	822.5498976	7134.871	1404	0.143461755
fuling	maidong	0	797.6588	771.77307	6935.364	1408	0.317234842
fuling	gegen	0	912.164	795.4030336	7005.578	1399	0.418029146
dihuang	huangqi	0	1926.3371	2221.806565	18654.521	1498	0.031218954
chuanxiong	wuweizi	0.13898917	6059.3902	2692.711961	22066.018	1282	0.516354929
baishao	gegen	0	1766.0621	1138.217861	10104.084	1166	0.39251422
danshen	gegen	0	4946.9286	4420.077631	38300.074	1092	0.863095683
huangqi	sanqi	0.004329004	4245.1916	4083.771619	35053.284	1210	0.437947391
baizhu	dangshen	0	3884.1844	2306.052754	19305.752	1082	0.92353817
huanglian	suanzaoren	0.027777778	1417.5128	1449.520502	12132.67	1087	0.818672963
baizhu	chenpi	0.06626506	3459.6717	2142.167848	17666.936	978	1
chenpi	fuling	0.052631579	2185.0583	1750.364799	15122.138	970	1
banxia	chenpi	0	3782.3916	2844.903164	23208.593	745	1
baizhu	suanzaoren	0	2247.1146	1214.352947	9679.669	1242	0.342667102
baizhu	chuanxiong	0	5933.9344	2466.733154	19515.707	1450	0.292525068
danshen	huanglian	0.004950495	5724.301	5366.777394	46290.135	1388	0
dihuang	sanqi	0	2519.4761	1960.275465	17078.435	1480	0.031218954
danshen	dihuang	0.018276762	4757.3378	4231.395899	36633.252	1517	0
fuling	huangqi	0.064516129	2448.2887	2730.217455	23313.605	1344	0.360822448
danggui	maidong	0	2455.1907	1215.69851	9405.825	1305	0.445116676
baishao	huangqi	0.004444444	3302.1868	3073.032283	26412.111	1341	0.155722777
dangshen	gancao	0.010830325	7534.0367	7823.245577	68756.883	1220	0.356583394
huanglian	wuweizi	0.00462963	3089.6056	2359.884651	20090.748	1259	0.809628371
danggui	huangqi	0.014035088	4105.8206	3174.142895	25784.066	1191	0.548236997
baizhu	maidong	0	2072.2722	1163.576119	9480.162	1308	0.525846952
dihuang	suanzaoren	0.5	450.5496	314.1390073	2475.787	1354	0.238078931
gegen	wuweizi	0	2312.2332	1413.184889	12100.687	1147	0.67463556
sanqi	suanzaoren	0	2769.4041	2176.104061	18874.55	938	1
banxia	wuweizi	0.002985075	4241.9273	2827.452412	23179.404	1377	0.113909799
banxia	suanzaoren	0	2569.8345	1917.088262	15221.326	1327	0.270435162
gancao	huangqi	0.059322034	7372.7544	8639.213327	75309.534	1492	0.045242876
baizhu	sanqi	0.023474178	4316.0411	2860.489405	24282.317	1134	0.768912585
baizhu	huanglian	0	2964.1498	2133.905845	17540.437	1349	0.236896479
baishao	fuling	0	2098.4229	1457.947019	13096.346	1285	0.352967555
banxia	danshen	0.14628821	6876.6227	5834.345154	49378.791	1222	0.384323657
chuanxiong	suanzaoren	0.018058691	4387.2974	1782.347811	14107.94	1242	0.621570667
danshen	huangqi	0.048387097	6483.0533	6354.892053	54608.101	1195	0.547993834
banxia	dangshen	0.050420168	4206.9043	3008.78807	24847.409	1145	0.922875056
danggui	suanzaoren	0.036866359	2630.0331	1266.475338	9605.332	1179	0.55375101
dihuang	huanglian	0	1167.5848	1233.691906	10336.555	1283	0.541871103
dangshen	fuling	0	2609.571	1914.249705	16760.954	1124	0.933663189
chuanxiong	danggui	0.117948718	6316.8529	2518.855546	19441.37	1025	1
dangshen	wuweizi	0.112781955	4009.6402	2532.03156	21856.063	1076	1
suanzaoren	wuweizi	0	2372.5704	1440.331753	12229.98	1004	1
gancao	suanzaoren	0.005405405	5896.9669	6731.54577	59130.8	1422	0.045242876
chenpi	chuanxiong	0.182978723	5599.8545	2710.162713	22095.207	1550	0.254030546
banxia	danggui	0.068452381	4499.39	2653.595997	20554.756	1488	0.101648777
banxia	huangqi	0.215469613	4045.622	3824.75582	31400.06	1477	0.431896645
banxia	chuanxiong	0.063636364	6256.6543	3169.46847	25057.364	1455	0.045242876
baishao	dangshen	0.032258065	3463.4691	2257.064533	19859.46	1271	0.981844654
baishao	sanqi	0.009836066	3895.3258	2811.501183	24836.025	1167	0.857445867
baishao	danshen	0.021153846	6133.1875	5082.621617	44390.842	1246	0.37222944
dangshen	sanqi	0.060728745	4406.4739	3267.803869	28500.633	1198	0.904245547
baishao	baizhu	0	3373.0363	1849.750068	15641.144	1097	1
danshen	suanzaoren	0.020887728	5007.2658	4447.224495	38429.367	1077	0.916980732
banxia	fuling	0.036809816	2841.8581	2209.670556	18084.295	1065	1
chuanxiong	sanqi	0.049209139	6456.2239	3428.484269	28710.588	1176	0.827783717
huanglian	sanqi	0.005494505	3486.4393	3095.65696	26735.318	1117	0.824567287
baizhu	gancao	0.053571429	7443.6039	7415.931113	64538.567	1012	0.858857974
fuling	sanqi	0	3041.4277	2468.686356	21737.519	1506	0
chenpi	danshen	0.064377682	6219.8229	5375.039397	46416.634	1389	0.060442487
gancao	huanglian	0.010050251	6614.0021	7651.098668	66991.568	1497	0.018155346
chenpi	danggui	0.061093248	3842.5902	2194.29024	17592.599	1427	0.26952754
danggui	fuling	0.03930131	2902.0567	1559.057632	12468.301	1421	0.259646489
danggui	danshen	0.042105263	6936.8213	5183.732229	43762.797	1390	0.045242876
chenpi	huanglian	0.007092199	2630.0699	2377.335404	20119.937	1367	0.177534843
chuanxiong	dangshen	0.052123552	6024.3672	2874.047619	23734.023	1388	0.217603856
dangshen	dihuang	0	2087.6194	1405.838815	12101.87	1478	0.078597833
banxia	gegen	0	2509.4973	1889.941398	15092.033	1220	0.438942558
baishao	gancao	0.038216561	7022.8886	7366.942891	65092.275	1193	0.72932087
baizhu	danggui	0.003649635	4176.6701	1950.860681	15013.099	1305	0.492667555
chuanxiong	danshen	0.071895425	8694.0856	5699.604703	48265.405	1191	0.621168248
danshen	wuweizi	0.023297491	6679.3586	5357.588644	46387.445	1143	0.667737971
chenpi	dangshen	0.057416268	3550.1045	2549.482313	21885.252	1112	0.79700338
gancao	sanqi	0.003021148	7965.8934	8377.682228	73733.448	1272	0.342667102
gancao	wuweizi	0.099099099	7569.0597	7641.909919	67088.878	1342	0.310402574
chenpi	huangqi	0	3388.8222	3365.450063	28437.903	1498	0
chuanxiong	gancao	0.019900498	9583.7867	7983.925978	68966.838	1464	0.12298668
gancao	gegen	0.005376344	5836.6297	6704.398906	59001.507	1253	0.39755407
fuling	huanglian	0	1689.5364	1742.102796	14995.639	1421	0.160709479
baishao	maidong	0	1651.5569	1114.587897	10033.87	1401	0.457657327
chuanxiong	dihuang	0.015801354	4137.3694	1566.519215	12311.825	1408	0.018155346
danggui	gegen	0	2569.6959	1239.328474	9476.039	1284	0.199482383
baishao	wuweizi	0.033232628	3498.4921	2075.728874	18191.455	1197	0.824567287
chuanxiong	huanglian	0.002150538	5104.3326	2701.90071	21968.708	1195	0.734459187
banxia	huanglian	0.005882353	3286.8697	2836.641161	23082.094	1228	0.780984037
fuling	gancao	0	6168.9905	7024.128064	61993.769	1214	0.496760567
dangshen	maidong	0	2162.705	1570.890583	13698.478	1162	0.553888158
banxia	gancao	0.003134796	7766.3238	8118.666429	70080.224	971	0.82763902
chenpi	dihuang	0.058823529	1663.1067	1241.953909	10463.054	1604	0
banxia	dihuang	0	2319.9065	1701.259666	13425.211	1631	0.031218954
banxia	sanqi	0.006666667	4638.761	3563.22472	29823.974	1297	0.400922199
gancao	maidong	0	5722.1245	6680.768942	58931.293	1472	0.005894324
fuling	wuweizi	0	2644.594	1732.914047	15092.949	1430	0.095754453
chenpi	gegen	0	1852.6975	1430.635641	12129.876	1205	0.472856939
baizhu	dihuang	0	1997.1866	998.5243504	7883.554	1448	0.12298668
gegen	suanzaoren	0	640.1404	502.8207394	4142.609	1225	0.630536724
baishao	chuanxiong	0	5513.2191	2417.744933	20069.415	1303	0.396134414
baizhu	wuweizi	0.008	3919.2074	2124.717096	17637.747	1164	0.933663189
baishao	dihuang	0	1576.4713	949.536129	8437.262	1363	0.400868966
maidong	suanzaoren	0	525.6352	479.1907758	4072.395	1240	0.59176382
gegen	huangqi	0.011627907	2115.9279	2410.488297	20321.343	1233	0.70172309
baishao	suanzaoren	0	1826.3993	1165.364725	10233.377	1111	0.87701332
sanqi	wuweizi	0.080745342	4441.4969	3086.468211	26832.628	922	0.968781046
chenpi	suanzaoren	0.058333333	1913.0347	1457.782505	12259.169	1380	0.12236782
chenpi	wuweizi	0.176245211	3585.1275	2368.146654	20217.247	1350	0.419024312
dihuang	fuling	0.259259259	722.5732	606.7213015	5338.756	1612	0.055268624
danshen	fuling	0.017632242	5279.2894	4739.806789	41292.336	1397	0.031218954
baizhu	gegen	0.013888889	2186.7774	1187.206082	9550.376	1167	0.771327957
huanglian	huangqi	0.02020202	2893.3003	3357.18806	28311.404	1319	0.375876017
chuanxiong	maidong	0	4212.455	1731.570984	13908.433	1294	0.6001262
dangshen	suanzaoren	0.008695652	2337.5474	1621.667411	13897.985	1236	0.219923585
dihuang	wuweizi	0	2122.6424	1224.503157	10433.865	1394	0.187797009
dangshen	huanglian	0.007692308	3054.5826	2541.22031	21758.753	1237	0.902444234
danggui	dangshen	0.045901639	4267.1029	2358.175145	19231.415	1225	0.85168869
baishao	banxia	0	3695.7562	2552.485384	21182.801	1152	0.737693631
danggui	sanqi	0.036312849	4698.9596	2912.611796	24207.98	1197	0.728812834
danshen	sanqi	0.050880626	7076.1923	6093.360953	53032.015	1109	0.742384479
danggui	dihuang	0.032258065	2380.1051	1050.646742	7809.217	1191	0.679438534
gegen	sanqi	0	2709.0669	2148.957197	18745.257	1019	1
