# Supplementary material for: Predicting Coupled Herbs for the Treatment of Hypertension Complicated with Coronary Heart Disease in Real-World Data Based on a Complex Network and Machine Learning
Source: Evid Based Complement Alternat Med. 2022 Jan 22;2022:8285111. doi: 10.1155/2022/8285111 (PMC8800635; doi:10.1155/2022/8285111)
Supplement: Supplementary Materials — 1. Apriori: rules of the core herbs obtained for the Apriori algorithm. 2. Features of coupled herbs: The value of Jaccard similarity coefficient, OB, RWR, GoSim, Manhattan distance, and KNN model output of coupled herbs. 3. The main coupled herbs: Seventy coupled herbs for adjuvant treatment of hypertension complicated with coronary heart disease screened by the KNN model. 4. TCM herbs information: the Chinese name, Pinyin name, Latin name, and English name of herbs in this study. [file 8285111.f1.zip › 8285111.f1/4. TCM herbs information.txt]

Chinese name	Pinyin name	Latin name	English name
°×Êõ	baizhu	Atractylodis Macrocephalae Rhizoma	rhizome of Largehead Atractylodes
³ÂÆ¤	chenpi	Citri Reticulatae Pericarpium	Dried Tangerine Peel
¸Ê²Ý	gancao	Glycyrrhizae Radix Et Rhizoma	Root of Ural Licorice
°ëÏÄ	banxia	Rhizoma Pinelliae	tuber of Pinellia
ÜòÜß	fuling	Poria	Indian Bread
µ¤²Î	danshen	Radix Salviae Liguliobae	root of Ligulilobe sage
µ³²Î	dangshen	Codonopsis Radix	root Pilose Asiabell
»ÆÁ¬	huanglian	Rhizoma Coptidis	rhizome of Chinese Goldthread
µ±¹é	danggui	Radix Angelicae Sinensis	root of Chinese Angelica
»ÆÜÎ	huangqi	Astragali Radix	root of Membranous Milkvetch
°×ÉÖ	baishao	Radix Paeoniae Alba	White peony root
¸ð¸ù	gegen	Puerariae Lobatae Radix	root of lobed kudzuvine
´¨Üº	chuanxiong	Chuanxiong Rhizoma	Chuanxiong rhizome, Szechuan lovage root
ÈýÆß	sanqi	Radix Notoginseng	Sanchi
Âó¶¬	maidong	Ophiopogonis Radix	Ophiopogon japonicus
µØ»Æ	dihuang	Rehmanniae Radix	Rehmannia glutinosa
ÎåÎ¶×Ó	wuweizi	Schisandrae Chinensis Fructus	Schisandrae Chinensis Fructus
ËáÔæÈÊ	suanzaoren	Ziziphi Spinosae Semen	Spine Date Seed
